# Supplementary material for: Long non-coding RNA MALAT1 protects preterm infants with bronchopulmonary dysplasia by inhibiting cell apoptosis
Source: BMC Pulm Med. 2017 Dec 13;17:199. doi: 10.1186/s12890-017-0524-1 (PMC5729463; doi:10.1186/s12890-017-0524-1)
Supplement: Supplementary file 2 — List of differentially expressed genes in GSE43830 (XLSX 56 kb) [file 12890_2017_524_MOESM2_ESM.xlsx]

## Sheet: Sheet1
Transcript Cluster ID	MALAT1 knock down Bi-weight Avg Signal (log2)	Control Bi-weight Avg Signal (log2)	Fold Change (linear) (MALAT1 konck down vs. Control)	ANOVA p-value (MALAT1 konck down vs. Control)	FDR p-value (MALAT1 konck down vs. Control)	Gene Symbol	Description	TC Comment
2376894	9.31	8.21	2.15	6e-06	0.032663	DYRK3	dual specificity tyrosine-(Y)-phosphorylation regulated kinase 3
2602997	9.07	6.46	6.11	1e-05	0.032663	SLC16A14	solute carrier family 16, member 14
2587790	4.78	7.52	-6.68	1.5e-05	0.032663	GPR155	G protein-coupled receptor 155
2809885	8.17	9.29	-2.17	1.5e-05	0.032663	SKIV2L2	superkiller viralicidic activity 2-like 2 (S. cerevisiae)
3838004	11.18	9.94	2.36	1.6e-05	0.032663	PPP1R15A	protein phosphatase 1, regulatory subunit 15A
2919669	9.1	7.32	3.44	2.2e-05	0.032663	PRDM1	PR domain containing 1, with ZNF domain
3986087	4.45	6.36	-3.76	2.6e-05	0.032663	NRK	Nik related kinase
3333711	12.48	11.24	2.35	4.2e-05	0.032663	SLC3A2	solute carrier family 3 (amino acid transporter heavy chain), member 2
2447414	8.1	5.99	4.31	4.6e-05	0.032663	NCF2	neutrophil cytosolic factor 2
3863504	10.1	8.8	2.46	4.9e-05	0.032663	DEDD2	death effector domain containing 2
3746809	9.06	6.24	7.07	5.3e-05	0.032663	CDRT1	CMT1A duplicated region transcript 1
3869396	9.17	6.88	4.87	6.4e-05	0.032663	ZNF841; ZNF432	zinc finger protein 841; zinc finger protein 432
3769779	7.93	9.37	-2.72	6.4e-05	0.032663	SLC39A11; POLR3KP2	solute carrier family 39, member 11; polymerase (RNA) III (DNA directed) polypeptide K, 12.3 kDa pseudogene 2
3565663	5.11	8.3	-9.14	7.3e-05	0.032663	DLGAP5	discs, large (Drosophila) homolog-associated protein 5
2766289	8.66	6.45	4.63	7.8e-05	0.032663	TMEM156	transmembrane protein 156
2394817	8.94	7.62	2.48	8e-05	0.032663	KLHL21	kelch-like family member 21
2568630	9.75	8.7	2.06	8.2e-05	0.032663	TGFBRAP1	transforming growth factor beta receptor associated protein 1
3539499	8.6	10.2	-3.02	8.3e-05	0.032663	RHOJ	ras homolog family member J
3759849	9.74	8.65	2.13	8.3e-05	0.032663	PLEKHM1; MIR4315-1; MIR4315-2	pleckstrin homology domain containing, family M (with RUN domain) member 1; microRNA 4315-1; microRNA 4315-2
2965653	6.46	8.64	-4.5	9.5e-05	0.032663	GPR63	G protein-coupled receptor 63
4012204	8.1	9.47	-2.57	9.8e-05	0.032663	HDAC8	histone deacetylase 8
3763270	8.67	9.73	-2.09	0.000101	0.032663	MMD	monocyte to macrophage differentiation-associated
2763550	6.93	5.23	3.25	0.000101	0.032663	PPARGC1A	peroxisome proliferator-activated receptor gamma, coactivator 1 alpha
3435078	8.1	6.67	2.69	0.000121	0.032988	WDR66	WD repeat domain 66
2432851	8.55	7.29	2.39	0.000125	0.032988	NBPF11; NBPF20; NBPF8; NBPF25P	neuroblastoma breakpoint family, member 11; neuroblastoma breakpoint family, member 20; neuroblastoma breakpoint family, member 8; neuroblastoma breakpoint family, member 25, pseudogene
3019519	10.22	8.7	2.87	0.000126	0.032988	IFRD1	interferon-related developmental regulator 1
3470037	10.21	9.04	2.24	0.000131	0.032988	PRDM4	PR domain containing 4
3458587	10.23	7.54	6.45	0.000135	0.032988	DDIT3	DNA-damage-inducible transcript 3
2649367	7.75	11	-9.52	0.00014	0.032988	PTX3	pentraxin 3, long
3609138	9.74	8.4	2.52	0.00014	0.032988	CHD2; LINC01578	chromodomain helicase DNA binding protein 2; long intergenic non-protein coding RNA 1578
3103293	11.44	10.24	2.3	0.000148	0.032988	RDH10	retinol dehydrogenase 10 (all-trans)
3673723	10.05	8.82	2.36	0.000149	0.032988	TRAPPC2L	trafficking protein particle complex 2-like
2341083	10.03	8.97	2.09	0.000158	0.032988	GADD45A	growth arrest and DNA-damage-inducible, alpha
3766651	8.02	6.77	2.37	0.000167	0.032988	ERN1	endoplasmic reticulum to nucleus signaling 1
3842755	9.94	8.93	2.01	0.00017	0.032988	ZNF667-AS1	ZNF667 antisense RNA 1 (head to head)
3601348	9.56	11.03	-2.78	0.000181	0.033113	LOXL1	lysyl oxidase-like 1
3770721	8.63	7.54	2.13	0.000189	0.033113	SLC25A19	solute carrier family 25 (mitochondrial thiamine pyrophosphate carrier), member 19
2551905	9.02	5.51	11.44	0.000193	0.033113	C2orf61	chromosome 2 open reading frame 61
2652027	10.2	12.04	-3.58	0.000195	0.033113	CLDN11	claudin 11
2843619	10.22	11.53	-2.49	0.000213	0.033539	HNRNPAB	heterogeneous nuclear ribonucleoprotein A/B
2377035	7.77	5.38	5.22	0.000223	0.033903	IL24	interleukin 24
2817941	10.39	9.2	2.29	0.000226	0.033903	RASGRF2	Ras protein-specific guanine nucleotide-releasing factor 2
3981164	7.55	4.74	7.03	0.000229	0.034175	ACRC	acidic repeat containing
3251566	6.65	5.54	2.17	0.000266	0.034551	OIT3	oncoprotein induced transcript 3
2320472	10.16	9.13	2.04	0.000272	0.034551	CLCN6; NPPA-AS1	chloride channel, voltage-sensitive 6; NPPA antisense RNA 1
3807261	8.07	7.03	2.05	0.000275	0.034551	SMAD7	SMAD family member 7
2948630	11.84	10.84	2.01	0.000285	0.034551	IER3	immediate early response 3
3791935	11.88	10.79	2.13	0.000289	0.034551	SERPINB2; SERPINB10	serpin peptidase inhibitor, clade B (ovalbumin), member 2; serpin peptidase inhibitor, clade B (ovalbumin), member 10
3372420	8.27	4.46	14.04	0.000292	0.034551	AGBL2	ATP/GTP binding protein-like 2
3458857	9.1	5.53	11.9	0.000298	0.034551	AVIL	advillin
3388830	10.47	7.86	6.08	0.000308	0.034551	MMP3	matrix metallopeptidase 3
3740201	9.65	10.81	-2.24	0.000314	0.034551	MYO1C	myosin IC
3260447	6.83	5.27	2.93	0.000317	0.034551	ABCC2	ATP binding cassette subfamily C member 2
3735478	9.59	8.04	2.92	0.000319	0.034551	SPHK1	sphingosine kinase 1
3072435	10.45	9.28	2.24	0.00032	0.034551	TMEM209	transmembrane protein 209
3294476	7.4	5.6	3.47	0.000325	0.034551	MSS51	MSS51 mitochondrial translational activator
3430086	9.5	8.26	2.37	0.00033	0.034551	TCP11L2	t-complex 11, testis-specific-like 2
3116839	5.65	6.79	-2.21	0.000332	0.034551	WISP1	WNT1 inducible signaling pathway protein 1
2348992	4.51	6.32	-3.5	0.000335	0.034551	VCAM1	vascular cell adhesion molecule 1
3874636	9.44	7.9	2.9	0.000335	0.034551	SMOX	spermine oxidase
2753880	9.58	8.26	2.49	0.000338	0.034551	CDKN2AIP	CDKN2A interacting protein
3717452	7.98	6.17	3.52	0.000342	0.034551	LRRC37B; SH3GL1P1	leucine rich repeat containing 37B; SH3-domain GRB2-like 1 pseudogene 1
3873160	9.64	7.84	3.48	0.000353	0.034551	TRIB3	tribbles pseudokinase 3
3106243	10.64	9.51	2.19	0.000353	0.034551	RIPK2	receptor-interacting serine-threonine kinase 2
2628260	7.91	5.3	6.12	0.000358	0.034551	KBTBD8	kelch repeat and BTB (POZ) domain containing 8
2674168	9.59	7.19	5.28	0.000359	0.034551	C3orf62	chromosome 3 open reading frame 62
2947081	9.82	11.02	-2.3	0.000385	0.036158	HIST1H4L	histone cluster 1, H4l
2604254	7.32	8.8	-2.78	0.000392	0.036517	HJURP	Holliday junction recognition protein
3243262	6.72	4.6	4.34	0.000407	0.036793	HSD17B7P2	hydroxysteroid (17-beta) dehydrogenase 7 pseudogene 2
2469252	8.12	9.86	-3.34	0.000416	0.036793	RRM2	ribonucleotide reductase M2
3713512	6.49	4.42	4.19	0.000435	0.036793	FBXW10	F-box and WD repeat domain containing 10
2999710	8.15	9.66	-2.85	0.000435	0.036793	DBNL	drebrin-like
2946215	8.78	10.73	-3.86	0.000435	0.036793	HIST1H3B	histone cluster 1, H3b
3449304	6.78	8.49	-3.27	0.000436	0.036793	IPO8	importin 8
2594773	8.22	5.03	9.08	0.000441	0.036988	ALS2CR12	amyotrophic lateral sclerosis 2 chromosome region candidate 12
2427898	7.1	5.47	3.1	0.000444	0.036988	OVGP1	oviductal glycoprotein 1
3106276	8.27	6.97	2.46	0.000454	0.037483	OSGIN2	oxidative stress induced growth inhibitor family member 2
3594825	7.28	8.56	-2.43	0.000462	0.037519	PIGB	phosphatidylinositol glycan anchor biosynthesis class B
2617148	6.94	4.92	4.06	0.000474	0.038351	C3orf35	chromosome 3 open reading frame 35
3068476	5.5	7.63	-4.38	0.000485	0.038442	TMEM168	transmembrane protein 168
2661992	9.47	10.64	-2.25	0.00049	0.038612	OXTR	oxytocin receptor
3742384	8.96	10.02	-2.09	0.000501	0.039022	SLC25A11	solute carrier family 25 (mitochondrial carrier; oxoglutarate carrier), member 11
3840406	5.56	3.5	4.17	0.000503	0.039022	ZNF137P	zinc finger protein 137, pseudogene
2369609	5.75	3.84	3.77	0.000509	0.039022	AXDND1	axonemal dynein light chain domain containing 1
2941784	7.8	9.07	-2.4	0.000518	0.039438	NEDD9	neural precursor cell expressed, developmentally down-regulated 9
2508520	8.08	6.6	2.8	0.000521	0.039438	KYNU	kynureninase
3842675	9.5	8.18	2.5	0.000524	0.039438	ZNF542P	zinc finger protein 542, pseudogene
2500615	7.56	9.23	-3.18	0.000548	0.039919	TMEM87B	transmembrane protein 87B
3938244	7.28	8.51	-2.34	0.00056	0.039919	PPIL2; MIR130B	peptidylprolyl isomerase (cyclophilin)-like 2; microRNA 130b
3944129	10.97	8.23	6.67	0.000563	0.039919	HMOX1	heme oxygenase 1
3550278	7.81	8.93	-2.18	0.000569	0.040083	BDKRB2; BDKRB1	bradykinin receptor B2; bradykinin receptor B1
2434129	8.66	10.37	-3.28	0.000569	0.040083	HIST2H2AB; HIST2H2BE	histone cluster 2, H2ab; histone cluster 2, H2be
2412988	8.8	7.79	2.01	0.000572	0.040117	COA7	cytochrome c oxidase assembly factor 7 (putative)
3324447	7.59	8.91	-2.5	0.00059	0.040524	FIBIN	fin bud initiation factor homolog (zebrafish)
2904946	7.98	6.89	2.12	0.000593	0.040524	MAPK13	mitogen-activated protein kinase 13
3308241	7.81	9.15	-2.53	0.000593	0.040524	GFRA1	GDNF family receptor alpha 1
2655113	9.14	7.67	2.77	0.000611	0.040524	KLHL24	kelch-like family member 24
3442641	7.44	6.33	2.16	0.000618	0.040524	CD163L1	CD163 molecule-like 1
2735221	8.22	9.64	-2.67	0.000624	0.040524	PKD2	polycystic kidney disease 2 (autosomal dominant)
2934451	9.02	6.41	6.09	0.000628	0.040524	SLC22A1	solute carrier family 22 (organic cation transporter), member 1
3526544	9.1	7.35	3.35	0.000679	0.0417	DCUN1D2	DCN1, defective in cullin neddylation 1, domain containing 2
2899102	8.74	10.44	-3.24	0.000679	0.0417	HIST1H3C	histone cluster 1, H3c
2997376	8.18	10.34	-4.48	0.00069	0.0417	ANLN	anillin actin binding protein
3840164	8.31	6.9	2.67	0.000699	0.0417	ZNF610	zinc finger protein 610
3439178	9.03	10.04	-2.02	0.000701	0.0417	PXMP2	peroxisomal membrane protein 2
3930781	7.56	6.53	2.04	0.000707	0.0417	SETD4	SET domain containing 4
2941721	6.49	8.66	-4.49	0.00071	0.0417	ELOVL2	ELOVL fatty acid elongase 2
3362191	8.22	6.68	2.91	0.000713	0.0417	SCUBE2	signal peptide, CUB domain, EGF-like 2
2443335	8.55	7.17	2.59	0.000714	0.0417	SLC19A2	solute carrier family 19 (thiamine transporter), member 2
3537264	8.13	9.17	-2.05	0.000716	0.0417	TMEM260	transmembrane protein 260
3720896	7.46	8.71	-2.37	0.000721	0.0417	CDC6	cell division cycle 6
3716579	8.82	7.72	2.16	0.000746	0.041976	LRRC37BP1; SH3GL1P2	leucine rich repeat containing 37B pseudogene 1; SH3-domain GRB2-like 1 pseudogene 2
3589697	6.65	8.83	-4.55	0.000754	0.042038	PAK6; BUB1B	p21 protein (Cdc42/Rac)-activated kinase 6; BUB1 mitotic checkpoint serine/threonine kinase B
3824993	12.86	10.54	5	0.000768	0.042038	GDF15; MIR3189	growth differentiation factor 15; microRNA 3189
3916527	6.68	8.44	-3.4	0.000771	0.042038	JAM2	junctional adhesion molecule 2
3522398	9.65	7.54	4.32	0.000777	0.042038	DOCK9	dedicator of cytokinesis 9
2562867	9.99	8.94	2.08	0.000778	0.042038	RNF103; RNF103-CHMP3; CHMP3	ring finger protein 103; RNF103-CHMP3 readthrough; charged multivesicular body protein 3
3836841	9.83	10.9	-2.1	0.000781	0.042038	CALM3	calmodulin 3 (phosphorylase kinase, delta)
3251298	9.72	8.41	2.48	0.000789	0.042038	CHST3	carbohydrate (chondroitin 6) sulfotransferase 3
3087703	7.26	8.55	-2.45	0.000791	0.042038	PDGFRL	platelet-derived growth factor receptor-like
2549455	7.99	6.49	2.82	0.000793	0.042038	THUMPD2	THUMP domain containing 2
2700197	6.42	8.59	-4.53	0.000805	0.042038	HLTF	helicase-like transcription factor
2361342	7.87	6.52	2.55	0.000807	0.042038	SEMA4A	sema domain, immunoglobulin domain (Ig), transmembrane domain (TM) and short cytoplasmic domain, (semaphorin) 4A
3742554	7.31	6.23	2.11	0.000812	0.042038	ZNF232	zinc finger protein 232
3697632	8.24	6.86	2.59	0.000813	0.042038	ZNF23	zinc finger protein 23
3619060	6.57	4.43	4.39	0.000829	0.042038	FSIP1	fibrous sheath interacting protein 1
3923632	8.2	9.24	-2.06	0.000832	0.042038	PFKL	phosphofructokinase, liver
3140258	8.92	10.93	-4.01	0.000835	0.042038	TRPA1	transient receptor potential cation channel, subfamily A, member 1
4024160	7.12	9.01	-3.72	0.000845	0.042038	ATP11C	ATPase, class VI, type 11C
2692136	7.1	5.99	2.15	0.000863	0.042038	HSPBAP1	HSPB (heat shock 27kDa) associated protein 1
2782694	9.39	10.41	-2.02	0.000867	0.042086	ARSJ	arylsulfatase family, member J
2818035	7.48	6.07	2.65	0.000878	0.042234	CKMT2	creatine kinase, mitochondrial 2 (sarcomeric)
3095057	6.22	3.82	5.28	0.000899	0.042334	ADAM32	ADAM metallopeptidase domain 32
3842839	8.42	6.75	3.19	0.00091	0.042454	ZNF470	zinc finger protein 470
3869847	8.91	7.23	3.21	0.000931	0.042835	ZNF468	zinc finger protein 468
3296046	8.52	9.69	-2.24	0.000932	0.042835	KCNMA1	potassium channel, calcium activated large conductance subfamily M alpha, member 1
3047581	11.89	10.19	3.26	0.000938	0.042966	INHBA	inhibin beta A
3831774	8.68	7.14	2.9	0.000945	0.043002	ZNF383	zinc finger protein 383
3747638	8.46	7.43	2.04	0.000963	0.043529	PLD6	phospholipase D family, member 6
3183364	9.19	7.91	2.44	0.000971	0.043707	TMEM38B	transmembrane protein 38B
3494502	7.48	8.52	-2.05	0.000982	0.043777	CLN5	ceroid-lipofuscinosis, neuronal 5
2900091	9.39	10.95	-2.97	0.000987	0.043777	HIST1H2AL; HIST1H2BN	histone cluster 1, H2al; histone cluster 1, H2bn
3423622	6.66	8.74	-4.23	0.000999	0.043885	SYT1	synaptotagmin I
3778252	9.41	8.37	2.05	0.001007	0.044033	ANKRD12	ankyrin repeat domain 12
2966078	7.17	8.31	-2.2	0.001024	0.04422	FBXL4	F-box and leucine-rich repeat protein 4
3452417	5.8	7.9	-4.3	0.001027	0.04422	SLC38A4	solute carrier family 38, member 4
3470523	10.33	8.08	4.73	0.001039	0.044303	SELPLG	selectin P ligand
3789947	9.81	8.35	2.75	0.001045	0.044303	NEDD4L	neural precursor cell expressed, developmentally down-regulated 4-like, E3 ubiquitin protein ligase
3394123	8.51	9.54	-2.04	0.001047	0.044303	HYOU1	hypoxia up-regulated 1
3379326	8.8	7.66	2.2	0.001059	0.044303	CHKA	choline kinase alpha
2769182	8.28	9.47	-2.28	0.001061	0.044303	SCFD2	sec1 family domain containing 2
3872310	7.46	6.31	2.22	0.001064	0.044303	ZNF550	zinc finger protein 550
2645951	5.82	7.43	-3.05	0.001067	0.044303	TRPC1	transient receptor potential cation channel, subfamily C, member 1
3183238	6.81	5.17	3.12	0.001075	0.044303	FSD1L; RALGAPA1P; RALGAPA1	fibronectin type III and SPRY domain containing 1-like; Ral GTPase activating protein, alpha subunit 1 (catalytic) pseudogene; Ral GTPase activating protein, alpha subunit 1 (catalytic)
3245682	10.03	8.79	2.36	0.001096	0.044594	MAPK8	mitogen-activated protein kinase 8
2674762	7.27	8.63	-2.56	0.001111	0.044803	UBA7	ubiquitin-like modifier activating enzyme 7
3817698	7.31	9.21	-3.73	0.001125	0.044914	UHRF1	ubiquitin-like with PHD and ring finger domains 1
2824089	8.29	7.19	2.14	0.001134	0.044942	SNORA13; EPB41L4A-AS1	small nucleolar RNA, H/ACA box 13; EPB41L4A antisense RNA 1
3786868	7.75	9.66	-3.75	0.001148	0.045144	SLC14A1	solute carrier family 14 (urea transporter), member 1 (Kidd blood group)
2955691	6.02	7.09	-2.1	0.001168	0.045329	RCAN2	regulator of calcineurin 2
3074577	11.59	10.04	2.92	0.001178	0.045366	FAM180A	family with sequence similarity 180, member A
2854241	9.78	8.57	2.3	0.001185	0.04538	RICTOR	RPTOR independent companion of MTOR, complex 2
3045004	7.66	6.43	2.35	0.001188	0.04538	NT5C3A	5-nucleotidase, cytosolic IIIA
2726910	8.65	7.34	2.48	0.001192	0.04538	SPATA18	spermatogenesis associated 18
3736290	7.57	8.79	-2.33	0.001192	0.04538	BIRC5	baculoviral IAP repeat containing 5
3851353	6.56	5.22	2.55	0.001199	0.04538	ZNF563	zinc finger protein 563
3619773	9.5	8.28	2.33	0.001215	0.045603	INO80	INO80 complex subunit
3607232	9	7.95	2.07	0.001223	0.045661	AEN; MIR7-2	apoptosis enhancing nuclease; microRNA 7-2
3065740	8.21	9.46	-2.38	0.001231	0.045692	RELN	reelin
3756676	6.93	8.59	-3.15	0.001266	0.046274	KRTAP1-5	keratin associated protein 1-5
3919033	7.81	10.52	-6.54	0.001268	0.046274	SLC5A3	solute carrier family 5 (sodium/myo-inositol cotransporter), member 3
3656829	7.98	9.23	-2.38	0.001271	0.046274	BCKDK	branched chain ketoacid dehydrogenase kinase
3005252	7.24	5.46	3.44	0.001274	0.046274	LOC84214	uncharacterized LOC84214
3181193	6.19	7.68	-2.82	0.00129	0.046344	TDRD7	tudor domain containing 7
2444283	8.07	9.29	-2.32	0.001296	0.046355	TNFSF4	tumor necrosis factor (ligand) superfamily, member 4
3124388	7.54	6.05	2.79	0.001313	0.046552	FAM167A	family with sequence similarity 167, member A
3147286	9.63	8.55	2.12	0.001334	0.046678	RRM2B	ribonucleotide reductase M2 B (TP53 inducible)
2811656	7.75	8.92	-2.26	0.001334	0.046678	KIF2A	kinesin heavy chain member 2A
3565571	6.15	7.88	-3.32	0.001338	0.046678	WDHD1	WD repeat and HMG-box DNA binding protein 1
3435515	7.32	4.75	5.92	0.001348	0.046769	CCDC62	coiled-coil domain containing 62
2518272	6.81	8.36	-2.95	0.001349	0.046769	ITGA4	integrin alpha 4
2711627	8.75	6.2	5.83	0.001353	0.046769	GP5	glycoprotein V (platelet)
3653516	7.7	5.77	3.82	0.001357	0.046782	SLC5A11	solute carrier family 5 (sodium/inositol cotransporter), member 11
3312490	7.14	9.02	-3.7	0.001373	0.046971	MKI67	marker of proliferation Ki-67
2653114	5.96	7.43	-2.78	0.001374	0.046971	NAALADL2	N-acetylated alpha-linked acidic dipeptidase-like 2
3722195	6.53	5.46	2.1	0.001395	0.047122	AOC3	amine oxidase, copper containing 3
3812074	10.16	11.22	-2.07	0.001397	0.047122	DSEL	dermatan sulfate epimerase-like
2720251	6.72	8.47	-3.35	0.001441	0.047209	NCAPG	non-SMC condensin I complex subunit G
3741528	10.73	11.89	-2.23	0.001514	0.047693	TAX1BP3; P2RX5-TAX1BP3	Tax1 (human T-cell leukemia virus type I) binding protein 3; P2RX5-TAX1BP3 readthrough (NMD candidate)
3142217	9.82	8.53	2.45	0.001521	0.047693	PAG1	phosphoprotein membrane anchor with glycosphingolipid microdomains 1
2632036	8.32	7.27	2.07	0.001521	0.047693	ZNF654	zinc finger protein 654
3525679	9.09	7.85	2.36	0.001531	0.047693	ANKRD10; ANKRD10-IT1	ankyrin repeat domain 10; ANKRD10 intronic transcript 1
3173479	9.67	4.64	32.67	0.001539	0.047693	FOXD4L3	forkhead box D4-like 3
2735027	7.26	5.89	2.59	0.001549	0.047693	SPP1	secreted phosphoprotein 1
2947077	9.59	10.7	-2.16	0.00155	0.047693	HIST1H3I	histone cluster 1, H3i
3853178	7.42	4.74	6.4	0.001551	0.047693	EPHX3	epoxide hydrolase 3
2739755	8.17	6.99	2.27	0.001554	0.047693	AP1AR	adaptor-related protein complex 1 associated regulatory protein
3453252	7.87	8.92	-2.08	0.001583	0.048014	ADCY6	adenylate cyclase 6
2334098	6.56	7.87	-2.49	0.001589	0.048048	KIF2C	kinesin family member 2C
4013434	8.7	9.81	-2.15	0.001595	0.04809	TAF9B	TAF9B RNA polymerase II, TATA box binding protein (TBP)-associated factor, 31kDa
7385515	7.78	11.75	-15.6	0.00161	0.048278	MALAT1	metastasis associated lung adenocarcinoma transcript 1 (non-protein coding)
2946364	6.75	8.19	-2.71	0.001612	0.048278	HIST1H3F	histone cluster 1, H3f
3851441	8.01	6.75	2.39	0.001633	0.048278	ZNF442	zinc finger protein 442
2807862	10.39	9.28	2.16	0.001643	0.048278	C5orf51	chromosome 5 open reading frame 51
3944922	9.69	10.73	-2.06	0.001651	0.048278	TRIOBP	TRIO and F-actin binding protein
2699145	5.26	6.63	-2.57	0.001655	0.048278	SLC9A9	solute carrier family 9, subfamily A (NHE9, cation proton antiporter 9), member 9
2817291	7.82	6.7	2.17	0.001677	0.0485	JMY	junction mediating and regulatory protein, p53 cofactor
3074912	7.62	5.82	3.47	0.001677	0.0485	DGKI	diacylglycerol kinase, iota
2977265	8.29	7.03	2.39	0.001711	0.049242	HIVEP2	human immunodeficiency virus type I enhancer binding protein 2
3464276	8.62	7.52	2.14	0.001715	0.049242	SLC6A15	solute carrier family 6 (neutral amino acid transporter), member 15
2476671	7.27	5.15	4.34	0.001737	0.04927	RASGRP3	RAS guanyl releasing protein 3 (calcium and DAG-regulated)
2813414	8.28	9.38	-2.16	0.001788	0.049733	CCNB1	cyclin B1
3869880	6.14	4.89	2.38	0.001809	0.049759	ZNF888; ZNF702P	zinc finger protein 888; zinc finger protein 702, pseudogene
2900051	7.59	9.09	-2.84	0.001818	0.049759	HIST1H3H	histone cluster 1, H3h
3217194	10.7	9.46	2.36	0.001852	0.050063	TBC1D2	TBC1 domain family, member 2
3310675	7.01	5.63	2.6	0.00186	0.050063	FAM24B; CUZD1	family with sequence similarity 24, member B; CUB and zona pellucida-like domains 1
2570616	6.81	8.63	-3.52	0.001867	0.050063	BUB1	BUB1 mitotic checkpoint serine/threonine kinase
3319898	9.07	7.96	2.16	0.001877	0.050063	ZNF143	zinc finger protein 143
3698055	10.22	8.84	2.61	0.001885	0.050063	TXNL4B	thioredoxin-like 4B
2870889	6.72	8.67	-3.87	0.001909	0.050063	NREP	neuronal regeneration related protein
3555300	8.82	7.54	2.43	0.001913	0.050063	CCNB1IP1	cyclin B1 interacting protein 1, E3 ubiquitin protein ligase
2353337	6.14	5.08	2.08	0.001916	0.050063	SLC22A15	solute carrier family 22, member 15
2612508	5.76	6.86	-2.14	0.001925	0.050063	GALNT15	polypeptide N-acetylgalactosaminyltransferase 15
3639031	8.41	9.82	-2.65	0.001926	0.050063	PRC1	protein regulator of cytokinesis 1
3258910	4.23	6.07	-3.56	0.001958	0.05061	HELLS	helicase, lymphoid-specific
3791958	6.8	4.23	5.95	0.001978	0.050614	SERPINB10	serpin peptidase inhibitor, clade B (ovalbumin), member 10
3471769	8.65	7.58	2.09	0.00199	0.050614	TMEM116	transmembrane protein 116
3342525	9.66	8.43	2.35	0.001995	0.050614	PCF11	PCF11 cleavage and polyadenylation factor subunit
3183305	5.81	7.6	-3.47	0.001999	0.050614	FKTN; FSD1L	fukutin; fibronectin type III and SPRY domain containing 1-like
2841491	9.47	7.78	3.23	0.002029	0.050614	CREBRF	CREB3 regulatory factor
4019160	5.37	7.25	-3.69	0.00203	0.050614	KLHL13	kelch-like family member 13
3744263	8.05	9.28	-2.36	0.002032	0.050614	AURKB; BORCS6	aurora kinase B; BLOC-1 related complex subunit 6
3971451	6.85	5.2	3.14	0.002035	0.050614	PHEX	phosphate regulating endopeptidase homolog, X-linked
3044938	10.31	8.98	2.5	0.002042	0.050614	RP9P; KBTBD2	retinitis pigmentosa 9 pseudogene; kelch repeat and BTB (POZ) domain containing 2
3741456	7.09	5.48	3.06	0.002054	0.050614	TRPV1	transient receptor potential cation channel, subfamily V, member 1
2427688	9.63	8.19	2.72	0.002054	0.050614	LRIF1	ligand dependent nuclear receptor interacting factor 1
3623270	8.11	6.63	2.79	0.002058	0.050649	SHC4	SHC (Src homology 2 domain containing) family, member 4
3278977	7.99	6.94	2.08	0.002065	0.050699	DCLRE1C	DNA cross-link repair 1C
3231835	6.99	5.39	3.02	0.002076	0.05089	IDI2-AS1	IDI2 antisense RNA 1
3852565	7.25	8.99	-3.34	0.002082	0.050936	ASF1B	anti-silencing function 1B histone chaperone
2868131	7.84	8.96	-2.17	0.002151	0.05142	ERAP1	endoplasmic reticulum aminopeptidase 1
3318844	7.35	6.29	2.08	0.002189	0.051747	DNHD1	dynein heavy chain domain 1
3563687	8.44	7.07	2.58	0.002197	0.051747	VCPKMT	valosin containing protein lysine (K) methyltransferase
2773719	6.88	5.44	2.72	0.002199	0.051747	CDKL2	cyclin-dependent kinase-like 2 (CDC2-related kinase)
3600283	7.69	8.86	-2.25	0.002201	0.051747	THSD4	thrombospondin type 1 domain containing 4
3469597	7.64	6.63	2.01	0.002207	0.051747	NUAK1	NUAK family, SNF1-like kinase, 1
2414998	9.54	8.51	2.05	0.002208	0.051747	MYSM1	Myb-like, SWIRM and MPN domains 1
3845782	7.66	9.08	-2.67	0.002225	0.051844	PLEKHJ1; MIR1227; MIR6789	pleckstrin homology domain containing, family J member 1; microRNA 1227; microRNA 6789
2321942	9.22	8.22	2.01	0.002245	0.051963	RSC1A1; DDI2	regulatory solute carrier protein, family 1, member 1; DNA-damage inducible 1 homolog 2
2438282	6.3	7.4	-2.14	0.002303	0.052352	IQGAP3	IQ motif containing GTPase activating protein 3
3920512	6.1	4.8	2.47	0.002346	0.052569	DSCR9	Down syndrome critical region 9 (non-protein coding)
3969422	9.63	8.35	2.42	0.002397	0.05266	RAB9A	RAB9A, member RAS oncogene family
2705014	3.97	5.47	-2.84	0.002402	0.05266	SLC7A14	solute carrier family 7, member 14
2827185	6.2	8	-3.49	0.002429	0.05266	LMNB1	lamin B1
3452478	8.88	7.73	2.22	0.00244	0.05266	AMIGO2	adhesion molecule with Ig-like domain 2
3061621	11.55	10.19	2.57	0.002456	0.052709	TFPI2	tissue factor pathway inhibitor 2
3896370	8.8	7.26	2.93	0.002468	0.052787	GPCPD1	glycerophosphocholine phosphodiesterase 1
3291435	4.25	5.82	-2.97	0.002485	0.052856	RTKN2	rhotekin 2
3607537	6.57	7.84	-2.42	0.002495	0.05287	FANCI	Fanconi anemia complementation group I
3756723	9.6	10.74	-2.21	0.002509	0.05287	KRTAP2-3; KRTAP2-2	keratin associated protein 2-3; keratin associated protein 2-2
3669552	6.44	8.76	-5	0.002511	0.05287	VAT1L	vesicle amine transport 1-like
3840286	6.71	4.13	5.97	0.002559	0.053229	ZNF578	zinc finger protein 578
2531233	7.02	5.57	2.73	0.002564	0.053229	SP140	SP140 nuclear body protein
3372097	8.34	9.61	-2.41	0.002565	0.053229	ACP2	acid phosphatase 2, lysosomal
3869361	7.38	5.62	3.38	0.002589	0.053296	ZNF615	zinc finger protein 615
2841699	8.43	7.42	2.02	0.002621	0.053296	CPEB4	cytoplasmic polyadenylation element binding protein 4
4011889	7.23	8.39	-2.24	0.002631	0.053296	ZMYM3	zinc finger, MYM-type 3
2889753	8.4	7.34	2.09	0.002665	0.053306	ZNF354A	zinc finger protein 354A
2722823	6.85	8.03	-2.28	0.002681	0.053306	PCDH7	protocadherin 7
2549565	7.38	8.45	-2.1	0.00269	0.053306	SLC8A1	solute carrier family 8 (sodium/calcium exchanger), member 1
2866704	10.12	8.94	2.26	0.002727	0.0534	ARRDC3	arrestin domain containing 3
2494484	6.96	8.47	-2.84	0.002768	0.053643	NCAPH; ITPRIPL1	non-SMC condensin I complex subunit H; inositol 1,4,5-trisphosphate receptor interacting protein-like 1
3019565	7	4.64	5.11	0.002776	0.05365	LSMEM1; IFRD1	leucine-rich single-pass membrane protein 1; interferon-related developmental regulator 1
3837707	6.78	5.51	2.41	0.002776	0.05365	ZNF114	zinc finger protein 114
2947073	6.13	7.72	-3.01	0.002848	0.054252	HIST1H1B	histone cluster 1, H1b
3466369	6.97	5.62	2.56	0.002856	0.054252	FGD6	FYVE, RhoGEF and PH domain containing 6
3463112	11.01	9.76	2.38	0.002913	0.054858	E2F7	E2F transcription factor 7
3984655	7.15	8.22	-2.1	0.002942	0.05504	CENPI	centromere protein I
3881443	8.68	9.85	-2.25	0.002984	0.055376	TPX2; ABALON	TPX2, microtubule-associated; apoptotic BCL2L1-antisense long non-coding RNA
3696554	6.3	4.66	3.13	0.003005	0.055541	TMED6	transmembrane p24 trafficking protein 6
3258477	5.05	6.31	-2.4	0.00304	0.055809	PLCE1	phospholipase C, epsilon 1
2806186	6.95	3.95	7.95	0.003044	0.055825	TTC23L; RPL21P54	tetratricopeptide repeat domain 23-like; ribosomal protein L21 pseudogene 54
3985320	8.45	7.33	2.17	0.003062	0.055899	BHLHB9; LINC00630	basic helix-loop-helix domain containing, class B, 9; long intergenic non-protein coding RNA 630
2330773	6.83	8.51	-3.2	0.003075	0.055937	CDCA8	cell division cycle associated 8
3250602	7.36	8.84	-2.8	0.00308	0.055937	H2AFY2	H2A histone family, member Y2
3377016	8.25	5.8	5.46	0.00308	0.055937	PYGM	phosphorylase, glycogen, muscle
3428333	8.4	9.94	-2.91	0.003082	0.055937	ANO4	anoctamin 4
3957160	6.76	8	-2.36	0.003116	0.056104	LIF	leukemia inhibitory factor
3756750	5.45	7.88	-5.41	0.003179	0.056827	KRTAP4-12; KRTAP4-11	keratin associated protein 4-12; keratin associated protein 4-11
3716950	8.74	7.43	2.48	0.0032	0.056975	ADAP2; RNF135	ArfGAP with dual PH domains 2; ring finger protein 135
3320819	7.89	5.33	5.9	0.003306	0.057419	MICALCL; MICAL2	MICAL C-terminal like; microtubule associated monooxygenase, calponin and LIM domain containing 2
2899206	9.07	10.15	-2.11	0.003316	0.057419	HIST1H2BF	histone cluster 1, H2bf
3869379	8.32	6.98	2.53	0.003319	0.057419	ZNF614	zinc finger protein 614
2711034	7.31	8.94	-3.1	0.003378	0.057701	MB21D2	Mab-21 domain containing 2
2915420	6.26	7.71	-2.72	0.003379	0.057701	PRSS35	protease, serine 35
3421244	9.84	8.72	2.17	0.003416	0.058082	SLC35E3	solute carrier family 35, member E3
2686602	6.25	5.02	2.33	0.00346	0.05848	IMPG2	interphotoreceptor matrix proteoglycan 2
3638760	7.87	8.91	-2.07	0.00348	0.05848	IDH2	isocitrate dehydrogenase 2 (NADP+), mitochondrial
3811086	6.72	7.98	-2.41	0.00348	0.05848	PIGN	phosphatidylinositol glycan anchor biosynthesis class N
2556302	6.85	5.72	2.19	0.003487	0.05848	PELI1	pellino E3 ubiquitin protein ligase 1
3936913	6.75	7.99	-2.37	0.003513	0.058675	CDC45	cell division cycle 45
3414351	6.81	7.83	-2.02	0.003531	0.058726	ASIC1	acid sensing ion channel 1
2992814	10.79	9.47	2.49	0.003548	0.058818	GPNMB	glycoprotein (transmembrane) nmb
2720584	7.09	9.13	-4.12	0.003552	0.058818	SLIT2; MIR218-1	slit guidance ligand 2; microRNA 218-1
3489673	7.46	5.93	2.89	0.003557	0.058818	KCNRG; TRIM13	potassium channel regulator; tripartite motif containing 13
3886223	7.66	8.91	-2.38	0.00361	0.059198	MYBL2	v-myb avian myeloblastosis viral oncogene homolog-like 2
3359897	8.21	6.43	3.44	0.003612	0.059198	CHRNA10; NUP98	cholinergic receptor, nicotinic alpha 10; nucleoporin 98kDa
2348060	9.38	8.11	2.41	0.003688	0.059867	PTBP2	polypyrimidine tract binding protein 2
3299970	8.8	7.01	3.47	0.003697	0.059914	ANKRD1	ankyrin repeat domain 1 (cardiac muscle)
2915491	8.78	7.66	2.17	0.003716	0.060066	CYB5R4	cytochrome b5 reductase 4
2780172	4.84	6.31	-2.76	0.003719	0.060067	CENPE	centromere protein E
3838886	9.05	10.1	-2.07	0.003753	0.060357	AP2A1	adaptor-related protein complex 2, alpha 1 subunit
3756193	7.74	9.39	-3.14	0.003825	0.060777	TOP2A	topoisomerase (DNA) II alpha
3599709	8.93	10.08	-2.22	0.003845	0.060984	GLCE	glucuronic acid epimerase
3824874	9.56	8.24	2.51	0.00394	0.061599	IFI30	interferon, gamma-inducible protein 30
3839142	8.7	7.4	2.47	0.00397	0.061846	ZNF473	zinc finger protein 473
3389878	7.96	6.94	2.02	0.004096	0.062856	ALKBH8	alkB homolog 8, tRNA methyltransferase
3260099	8.16	7.15	2.01	0.004106	0.062856	R3HCC1L	R3H domain and coiled-coil containing 1-like
3535780	8.97	10.01	-2.05	0.004213	0.063482	PTGER2	prostaglandin E receptor 2
3025433	5.27	4.06	2.32	0.004251	0.06365	AKR1B15; AKR1B10	aldo-keto reductase family 1, member B15; aldo-keto reductase family 1, member B10 (aldose reductase)
2880292	8.43	9.7	-2.41	0.004321	0.063857	DPYSL3	dihydropyrimidinase-like 3
3351498	7.49	8.53	-2.05	0.004338	0.063861	TMEM25; TTC36	transmembrane protein 25; tetratricopeptide repeat domain 36
2610241	5.32	6.53	-2.32	0.004354	0.063861	FANCD2	Fanconi anemia complementation group D2
3851150	6.54	5.52	2.02	0.004389	0.064202	ZNF433; ZNF823	zinc finger protein 433; zinc finger protein 823
2404418	8.77	7.72	2.08	0.004392	0.064202	FABP3	fatty acid binding protein 3, muscle and heart
3128046	11.8	10.54	2.4	0.004439	0.064401	STC1	stanniocalcin 1
3447348	6.54	7.64	-2.15	0.004441	0.064401	SOX5	SRY box 5
2350316	5.39	4.27	2.18	0.004446	0.064401	FNDC7	fibronectin type III domain containing 7
2333136	9.32	10.89	-2.96	0.004452	0.064401	CDC20	cell division cycle 20
3290210	7.07	8.33	-2.4	0.004487	0.064401	ZWINT	ZW10 interacting kinetochore protein
3136888	7.41	8.99	-2.99	0.004515	0.064563	TOX	thymocyte selection-associated high mobility group box
4012142	3.17	4.59	-2.69	0.004539	0.064716	ERCC6L	excision repair cross-complementation group 6-like
3059667	5.41	7.05	-3.1	0.004562	0.06473	SEMA3D	sema domain, immunoglobulin domain (Ig), short basic domain, secreted, (semaphorin) 3D
2900059	9.94	11.55	-3.05	0.004566	0.06473	HIST1H2BM	histone cluster 1, H2bm
2652801	5.64	7.36	-3.3	0.004598	0.064982	NLGN1	neuroligin 1
2566021	7.75	8.78	-2.04	0.004612	0.065045	ACTR1B	ARP1 actin-related protein 1 homolog B, centractin beta (yeast)
3972929	9.18	7.91	2.41	0.004677	0.065218	GK; CKS1BP6	glycerol kinase; CDC28 protein kinase regulatory subunit 1B pseudogene 6
3795733	6.94	8.09	-2.22	0.004694	0.065218	COLEC12	collectin sub-family member 12
7385547	8.59	10.72	-4.36	0.004701	0.065218	CCL2	chemokine (C-C motif) ligand 2
4018729	6.84	5.47	2.6	0.00471	0.065218	IL13RA2	interleukin 13 receptor, alpha 2
3442322	6.42	7.67	-2.37	0.004711	0.065218	CDCA3	cell division cycle associated 3
3623751	5.27	3.83	2.71	0.004756	0.065512	USP50	ubiquitin specific peptidase 50
2854092	7.49	8.65	-2.24	0.004769	0.065512	LIFR	leukemia inhibitory factor receptor alpha
3145107	4.9	6.9	-4.01	0.004781	0.065512	CCNE2	cyclin E2
3409081	9.28	8.19	2.13	0.004815	0.065613	STK38L	serine/threonine kinase 38 like
3909247	8.93	7.84	2.13	0.004882	0.065853	FAM65C	family with sequence similarity 65, member C
2366753	8.54	7.39	2.23	0.004889	0.065853	GORAB	golgin, RAB6-interacting
3168385	7.86	9.13	-2.41	0.004906	0.065853	GLIPR2	GLI pathogenesis-related 2
3019793	4.19	5.36	-2.26	0.004979	0.066239	FOXP2	forkhead box P2
3442427	9.35	11.05	-3.24	0.005014	0.066595	LPCAT3	lysophosphatidylcholine acyltransferase 3
3980560	7.02	8.24	-2.33	0.005041	0.066603	KIF4A	kinesin family member 4A
3129149	6.16	8.31	-4.46	0.005061	0.066603	PBK	PDZ binding kinase
2366581	5.18	6.36	-2.27	0.005067	0.066603	C1orf112	chromosome 1 open reading frame 112
2593352	9.15	8.07	2.11	0.005106	0.066711	GTF3C3	general transcription factor IIIC subunit 3
3972093	5.36	6.71	-2.55	0.005119	0.066711	POLA1; SCARNA23	polymerase (DNA directed), alpha 1, catalytic subunit; small Cajal body-specific RNA 23
2351854	7.35	5.33	4.05	0.00514	0.066752	C1orf162	chromosome 1 open reading frame 162
3528944	7.17	6.05	2.17	0.005162	0.06679	REM2	RAS (RAD and GEM)-like GTP binding 2
3007960	7.29	6.24	2.08	0.005214	0.066889	CLDN4	claudin 4
3834502	7.21	5.58	3.1	0.005272	0.067094	CD79A	CD79a molecule, immunoglobulin-associated alpha
2931036	9.93	8.27	3.16	0.005314	0.067218	ULBP1	UL16 binding protein 1
3867796	7.4	8.59	-2.27	0.005324	0.067218	TEAD2	TEA domain family member 2
3235789	6.03	7.36	-2.52	0.005327	0.067218	MCM10	minichromosome maintenance 10 replication initiation factor
3452818	9.04	7.88	2.24	0.005369	0.06738	VDR	vitamin D (1,25- dihydroxyvitamin D3) receptor
3905145	11.7	10.61	2.14	0.005442	0.067728	TGM2	transglutaminase 2
3587457	7.07	8.32	-2.38	0.005488	0.068022	ARHGAP11A	Rho GTPase activating protein 11A
2436467	5.81	4.42	2.63	0.005517	0.068164	NUP210L	nucleoporin 210kDa like
2349402	6.74	4.67	4.21	0.00553	0.068194	AMY2B; ACTG1P4	amylase, alpha 2B (pancreatic); actin gamma 1 pseudogene 4
2378019	9	6.81	4.57	0.005541	0.068242	CAMK1G	calcium/calmodulin-dependent protein kinase IG
4019486	6.78	8.23	-2.73	0.005578	0.068373	2017-09-06	septin 6
3767169	7.73	6.08	3.15	0.005649	0.068659	LRRC37A3	leucine rich repeat containing 37, member A3
2931970	6.11	4.04	4.2	0.005663	0.068659	MYCT1	myc target 1
3752271	5.59	3.89	3.25	0.005676	0.068659	EVI2A	ecotropic viral integration site 2A
3605268	7.78	6.69	2.14	0.005841	0.069132	TM6SF1	transmembrane 6 superfamily member 1
3335124	5.93	4.77	2.23	0.005844	0.069132	TIGD3	tigger transposable element derived 3
3703112	7.8	9.31	-2.85	0.005874	0.069251	GINS2	GINS complex subunit 2 (Psf2 homolog)
3145149	9.36	8.34	2.03	0.005897	0.069483	TP53INP1	tumor protein p53 inducible nuclear protein 1
3496637	8.71	9.84	-2.19	0.00601	0.069904	GPC6	glypican 6
3810133	8.34	9.53	-2.28	0.006044	0.070057	ALPK2	alpha kinase 2
3591704	6.87	8.28	-2.65	0.006096	0.070222	WDR76	WD repeat domain 76
3743906	8.92	10.05	-2.2	0.006114	0.070314	TP53	tumor protein p53
2815139	8.78	7.67	2.15	0.006136	0.070426	FCHO2	FCH domain only 2
3798829	6.79	8.07	-2.42	0.006233	0.071111	PIEZO2	piezo-type mechanosensitive ion channel component 2
2553262	8.97	6.94	4.07	0.006279	0.071139	GPR75-ASB3; GPR75; ASB3	GPR75-ASB3 readthrough; G protein-coupled receptor 75; ankyrin repeat and SOCS box containing 3
2593796	5.83	7.77	-3.84	0.006279	0.071139	RFTN2	raftlin family member 2
2594313	7.34	6	2.55	0.006293	0.071139	TYW5	tRNA-yW synthesizing protein 5
2914777	4.95	6.61	-3.16	0.006345	0.071193	TTK	TTK protein kinase
2830638	7.7	9.53	-3.56	0.006539	0.072245	KIF20A	kinesin family member 20A
2712794	7.63	6.49	2.2	0.006619	0.07276	TM4SF19; TCTEX1D2; TM4SF19-TCTEX1D2	transmembrane 4 L six family member 19; Tctex1 domain containing 2; TM4SF19-TCTEX1D2 readthrough (NMD candidate)
3466499	7.23	8.59	-2.56	0.006677	0.072858	USP44	ubiquitin specific peptidase 44
3378830	9.19	10.32	-2.18	0.006678	0.072858	CORO1B	coronin, actin binding protein, 1B
3333086	8.96	7.49	2.76	0.006704	0.072916	RPLP0P2	ribosomal protein, large, P0 pseudogene 2
2378937	8.17	9.6	-2.69	0.006852	0.073931	DTL	denticleless E3 ubiquitin protein ligase homolog (Drosophila)
3543979	8.1	6.82	2.43	0.007048	0.075089	BBOF1	basal body orientation factor 1
2953435	7.44	6.42	2.02	0.007054	0.075089	OARD1	O-acyl-ADP-ribose deacylase 1
2801694	7.83	6.81	2.02	0.007108	0.075227	ROPN1L	rhophilin associated tail protein 1-like
2406420	4.74	5.88	-2.21	0.007128	0.075227	CLSPN	claspin
2522916	7.72	8.81	-2.13	0.007146	0.0753	CDK15	cyclin-dependent kinase 15
3220484	7.05	5.33	3.29	0.007198	0.075504	OR2K2	olfactory receptor, family 2, subfamily K, member 2
2666807	7.75	6.2	2.93	0.007198	0.075504	NEK10	NIMA-related kinase 10
2886535	6.64	5.46	2.27	0.007228	0.075672	LOC100133106	VCEW9374
3550485	5.96	7.08	-2.16	0.007243	0.07571	VRK1; LINC00618	vaccinia related kinase 1; long intergenic non-protein coding RNA 618
3835372	7	5.89	2.16	0.00737	0.076187	ZNF223; ZNF284	zinc finger protein 223; zinc finger protein 284
2705030	5.42	8.01	-6.02	0.007427	0.076537	SLC7A14	solute carrier family 7, member 14
2948564	8.65	6.97	3.19	0.007455	0.076749	MDC1	mediator of DNA-damage checkpoint 1
2373336	7.36	8.5	-2.2	0.007558	0.077132	CFH	complement factor H
3645565	10.37	9.04	2.51	0.007558	0.077132	THOC6	THO complex 6
2339872	7.49	8.74	-2.38	0.007563	0.077132	ROR1	receptor tyrosine kinase-like orphan receptor 1
3151607	7.3	5.56	3.34	0.007584	0.077199	FBXO32	F-box protein 32
3514849	6.11	7.39	-2.43	0.007655	0.077547	NEK3	NIMA-related kinase 3
3630228	4.65	5.67	-2.03	0.007686	0.077682	LCTL	lactase-like
3407849	5.91	4.08	3.54	0.007697	0.077682	SPX	spexin hormone
3021269	7.79	9.23	-2.72	0.007852	0.078384	WNT16	wingless-type MMTV integration site family, member 16
3860410	8.04	6.82	2.32	0.007948	0.0788	ZFP82	ZFP82 zinc finger protein
3474104	6.78	7.88	-2.14	0.008034	0.0792	CIT	citron rho-interacting serine/threonine kinase
2512752	7.5	6.24	2.4	0.008045	0.079259	TBR1; SLC4A10	T-box, brain, 1; solute carrier family 4, sodium bicarbonate transporter, member 10
2840789	9.81	8.18	3.1	0.008199	0.08004	FGF18	fibroblast growth factor 18
2858592	5.62	6.74	-2.17	0.008217	0.080066	DEPDC1B	DEP domain containing 1B
2947095	6.01	7.24	-2.34	0.008247	0.08014	HIST1H3J	histone cluster 1, H3j
2418078	7.26	8.29	-2.03	0.008388	0.08089	NEGR1	neuronal growth regulator 1
3074531	9.31	7.01	4.94	0.008616	0.082041	SLC13A4; FAM180A	solute carrier family 13 (sodium/sulfate symporter), member 4; family with sequence similarity 180, member A
3563395	5.09	6.66	-2.97	0.008717	0.082316	POLE2	polymerase (DNA directed), epsilon 2, accessory subunit
2571457	6.59	7.8	-2.31	0.008752	0.082529	CKAP2L	cytoskeleton associated protein 2-like
2435005	8.09	9.33	-2.36	0.00883	0.083013	SELENBP1	selenium binding protein 1
2388219	6.04	7.37	-2.51	0.008975	0.083679	EXO1; RPL23AP20	exonuclease 1; ribosomal protein L23a pseudogene 20
3850660	6.94	8	-2.08	0.009002	0.083804	SPC24	SPC24, NDC80 kinetochore complex component
4041113	5.27	6.4	-2.19	0.009008	0.083816	KPNA2	karyopherin alpha 2 (RAG cohort 1, importin alpha 1)
3453837	9.43	10.78	-2.56	0.009039	0.083936	TUBA1A	tubulin, alpha 1a
3443348	9.38	8.24	2.2	0.0094	0.085596	A2M	alpha-2-macroglobulin
2449559	6.52	7.62	-2.14	0.009449	0.085713	ASPM	abnormal spindle microtubule assembly
3141755	6.99	5.84	2.21	0.009499	0.08581	HEY1	hes-related family bHLH transcription factor with YRPW motif 1
3331903	4.9	7.34	-5.42	0.009647	0.086132	FAM111B	family with sequence similarity 111, member B
2862380	7.28	5.99	2.44	0.009792	0.08668	ANKRA2	ankyrin repeat, family A (RFXANK-like), 2
3485074	8.03	9.05	-2.03	0.009812	0.08679	RFC3	replication factor C subunit 3
3199431	7.18	8.52	-2.54	0.01007	0.087925	ZDHHC21	zinc finger, DHHC-type containing 21
2603395	4.84	6.12	-2.42	0.010284	0.088453	HTR2B	5-hydroxytryptamine (serotonin) receptor 2B, G protein-coupled
2499053	8.99	7.43	2.94	0.010318	0.088502	LIMS1	LIM and senescent cell antigen-like domains 1
2971801	8.44	9.48	-2.06	0.010327	0.088502	MAN1A1	mannosidase, alpha, class 1A, member 1
3607510	7.92	9.05	-2.19	0.010391	0.088729	FANCI	Fanconi anemia complementation group I
2391687	7.97	6.76	2.31	0.010561	0.08938	NADK	NAD kinase
3753500	8.09	9.38	-2.46	0.010648	0.0896	SLFN11	schlafen family member 11
3590014	6.8	8.25	-2.72	0.010706	0.089674	CASC5	cancer susceptibility candidate 5
3046739	6.23	7.38	-2.22	0.010773	0.089748	AMPH	amphiphysin
3971806	9.9	8.64	2.4	0.010774	0.089748	SAT1	spermidine/spermine N1-acetyltransferase 1
3768412	10.2	7.29	7.53	0.010785	0.089803	SLC16A6	solute carrier family 16, member 6
2592598	5.42	7.11	-3.23	0.010922	0.090316	TMEFF2	transmembrane protein with EGF-like and two follistatin-like domains 2
2617659	7.52	6	2.85	0.010952	0.090439	SLC22A14	solute carrier family 22, member 14
3148463	8.25	9.28	-2.04	0.011003	0.090782	ANGPT1	angiopoietin 1
3260586	9.66	10.94	-2.42	0.011007	0.090782	SCD	stearoyl-CoA desaturase (delta-9-desaturase)
2731332	7.81	6.2	3.05	0.011102	0.091161	CXCL8	chemokine (C-X-C motif) ligand 8
2577896	6.09	7.35	-2.4	0.011144	0.091161	MCM6	minichromosome maintenance complex component 6
3767230	7.27	5.99	2.44	0.011176	0.0913	LRRC37A3	leucine rich repeat containing 37, member A3
3608298	4.95	6.39	-2.73	0.011288	0.091627	BLM	Bloom syndrome, RecQ helicase-like
4015548	6.07	4.52	2.92	0.011416	0.092107	XKRX	X-linked Kx blood group related, X-linked
2471233	4.82	5.91	-2.12	0.011542	0.092628	VSNL1	visinin like 1
3089816	7.7	6.56	2.2	0.011635	0.093139	TNFRSF10C	tumor necrosis factor receptor superfamily, member 10c, decoy without an intracellular domain
2644202	6.46	5.1	2.57	0.011787	0.093567	IL20RB	interleukin 20 receptor beta
2739267	5.37	4.08	2.44	0.01207	0.094714	RRH	retinal pigment epithelium-derived rhodopsin homolog
3140213	9	7.71	2.44	0.012136	0.094958	MSC	musculin
3849730	7.25	5.64	3.05	0.012224	0.095333	ZNF560	zinc finger protein 560
3881010	2.92	4.53	-3.06	0.012253	0.095518	LOC100134868; LOC105372584	uncharacterized LOC100134868; uncharacterized LOC105372584
3603436	5.7	7.17	-2.77	0.012475	0.096618	CHRNA5	cholinergic receptor, nicotinic alpha 5
3996598	6.2	2.36	14.3	0.012646	0.097235	FAM223B	family with sequence similarity 223, member B (non-protein coding)
2623821	7.65	6.37	2.44	0.012763	0.097659	PHF7	PHD finger protein 7
2838656	5.19	6.76	-2.97	0.012905	0.09828	HMMR	hyaluronan-mediated motility receptor (RHAMM)
3105430	3.26	4.85	-3.01	0.012914	0.098302	LRRCC1	leucine rich repeat and coiled-coil centrosomal protein 1
3780287	8.1	7.09	2.02	0.012938	0.098347	RNMT	RNA (guanine-7-) methyltransferase
2484970	7.81	9	-2.28	0.01296	0.098347	EHBP1	EH domain binding protein 1
2710764	7.36	5.55	3.49	0.013002	0.098581	UTS2B	urotensin 2B
2805078	10.27	11.33	-2.09	0.013044	0.098767	CDH6	cadherin 6, type 2, K-cadherin (fetal kidney)
2875529	7.49	5.04	5.43	0.013158	0.099092	GDF9	growth differentiation factor 9
2462511	8.45	9.68	-2.35	0.013277	0.099555	HEATR1	HEAT repeat containing 1
3258168	6.5	7.84	-2.53	0.01332	0.099804	KIF11	kinesin family member 11
3000953	8.21	6.8	2.65	0.013333	0.099818	UPP1	uridine phosphorylase 1
3262535	8.49	7.09	2.63	0.013352	0.099852	GSTO2	glutathione S-transferase omega 2
2971678	6.53	5.42	2.16	0.013353	0.099852	MCM9	minichromosome maintenance 9 homologous recombination repair factor
2928461	6.6	8.08	-2.78	0.013407	0.100021	ADGRG6	adhesion G protein-coupled receptor G6
2650199	7.92	9.07	-2.22	0.014047	0.102984	SMC4; MIR16-2; MIR15B	structural maintenance of chromosomes 4; microRNA 16-2; microRNA 15b
2884623	7.27	8.32	-2.07	0.014064	0.102988	C1QTNF2	C1q and tumor necrosis factor related protein 2
2964231	5.74	4.46	2.42	0.014154	0.103189	RRAGD	Ras-related GTP binding D
2739160	6.67	8.06	-2.62	0.014275	0.103661	CCDC109B	coiled-coil domain containing 109B
2666884	7.69	6.4	2.43	0.014309	0.103788	NEK10	NIMA-related kinase 10
2991860	5.63	7.05	-2.68	0.015119	0.106554	ITGB8	integrin beta 8
2934191	6.86	5.83	2.05	0.015174	0.106616	PNLDC1	poly(A)-specific ribonuclease (PARN)-like domain containing 1
2620256	5.49	6.95	-2.75	0.015201	0.106729	KIF15	kinesin family member 15
2519577	9.22	10.29	-2.1	0.015434	0.107767	COL3A1	collagen, type III, alpha 1
2938636	7.3	8.43	-2.19	0.015577	0.108133	GMDS	GDP-mannose 4,6-dehydratase
3722182	6.81	5.22	3.01	0.015682	0.108378	AOC2	amine oxidase, copper containing 2 (retina-specific)
2571217	7.76	6.67	2.13	0.015745	0.108568	ZC3H8	zinc finger CCCH-type containing 8
2867443	7.38	6.05	2.53	0.015796	0.108568	MCTP1	multiple C2 domains, transmembrane 1
3774218	7.49	5.99	2.84	0.015841	0.108693	PPP1R27	protein phosphatase 1, regulatory subunit 27
3721989	7.51	8.6	-2.13	0.015921	0.109011	CNTNAP1	contactin associated protein 1
3168508	7.63	8.64	-2.01	0.016036	0.109565	MELK	maternal embryonic leucine zipper kinase
2499234	6.48	5.32	2.23	0.016759	0.11134	CCDC138	coiled-coil domain containing 138
2585933	4.51	6.39	-3.68	0.016843	0.111681	SPC25	SPC25, NDC80 kinetochore complex component
2856995	6.56	5.45	2.15	0.017759	0.114879	ESM1	endothelial cell-specific molecule 1
2617630	6.86	5.69	2.25	0.018054	0.115805	SLC22A13	solute carrier family 22 (organic anion/urate transporter), member 13
3057505	6.33	4.98	2.55	0.018605	0.117401	CCL26	chemokine (C-C motif) ligand 26
3360456	6.44	7.52	-2.12	0.018745	0.11799	OR51B5; HBE1; HBG2	olfactory receptor, family 51, subfamily B, member 5; hemoglobin, epsilon 1; hemoglobin, gamma G
3183219	4.14	2.81	2.51	0.019053	0.1189	FSD1L	fibronectin type III and SPRY domain containing 1-like
3671076	8.99	7.17	3.54	0.019144	0.119034	HSD17B2	hydroxysteroid (17-beta) dehydrogenase 2
3404436	5.93	4.85	2.12	0.019533	0.119965	CLEC2D	C-type lectin domain family 2, member D
2331558	8	6.38	3.08	0.019753	0.120772	BMP8A	bone morphogenetic protein 8a
2448382	7.22	5.83	2.63	0.019869	0.120979	PTGS2	prostaglandin-endoperoxide synthase 2 (prostaglandin G/H synthase and cyclooxygenase)
3382216	8.31	9.5	-2.29	0.02	0.121259	ARRB1	arrestin, beta 1
3023038	7.04	5.78	2.41	0.020099	0.12156	FAM71F1	family with sequence similarity 71, member F1
2731542	10.15	8.36	3.47	0.02101	0.124662	AREG	amphiregulin
2319340	7.65	6.38	2.4	0.021043	0.124779	SLC25A33; RPL9P11	solute carrier family 25 (pyrimidine nucleotide carrier), member 33; ribosomal protein L9 pseudogene 11
3248289	6.05	8.11	-4.17	0.021126	0.125078	CDK1	cyclin-dependent kinase 1
3347658	6.62	7.91	-2.45	0.021556	0.126173	ATM	ATM serine/threonine kinase
3426169	6.81	5.38	2.69	0.021654	0.126517	NUDT4; NUDT4P1; NUDT4P2	nudix hydrolase 4; nudix hydrolase 4 pseudogene 1; nudix hydrolase 4 pseudogene 2
3061438	8.19	7.09	2.14	0.021821	0.127217	SAMD9	sterile alpha motif domain containing 9
3386217	8.05	6.12	3.82	0.022082	0.127742	CHORDC1	cysteine and histidine rich domain containing 1
3274758	5.8	7.14	-2.53	0.022096	0.127767	AKR1C2	aldo-keto reductase family 1, member C2
2918982	5.75	6.91	-2.23	0.02223	0.128159	GRIK2	glutamate receptor, ionotropic, kainate 2
3386638	6.75	8.18	-2.7	0.022282	0.128257	SLC36A4	solute carrier family 36 (proton/amino acid symporter), member 4
3854836	8.07	6.96	2.16	0.022336	0.128453	KIAA1683	KIAA1683
3414739	6.37	7.45	-2.11	0.022412	0.128777	METTL7A	methyltransferase like 7A
3334257	8.27	6.95	2.48	0.023148	0.130431	FERMT3	fermitin family member 3
2410470	7.03	8.13	-2.15	0.023755	0.131695	PIK3R3	phosphoinositide-3-kinase, regulatory subunit 3 (gamma)
2341663	6.34	5.21	2.19	0.023904	0.132137	CTH	cystathionine gamma-lyase
3952508	7.49	6.2	2.44	0.024395	0.133367	DGCR14	DiGeorge syndrome critical region gene 14
3515965	6.37	7.45	-2.12	0.024818	0.134613	DIAPH3	diaphanous-related formin 3
3776139	5.86	7.01	-2.22	0.024995	0.135148	NDC80	NDC80 kinetochore complex component
3850501	7.45	6.36	2.14	0.025516	0.136648	ILF3-AS1	ILF3 antisense RNA 1 (head to head)
3257338	5.86	6.87	-2.01	0.025875	0.137645	KIF20B	kinesin family member 20B
3090697	6.47	7.54	-2.09	0.025929	0.137738	CDCA2	cell division cycle associated 2
3567333	8.88	9.91	-2.04	0.026153	0.138529	SIX1	SIX homeobox 1
3027961	4.43	3.37	2.09	0.026324	0.139013	TAS2R5	taste receptor, type 2, member 5
2516023	5.73	6.87	-2.2	0.026455	0.139214	CDCA7	cell division cycle associated 7
2769512	6.47	4.99	2.78	0.026623	0.139639	RPL21P44	ribosomal protein L21 pseudogene 44
3000905	4.57	6.03	-2.75	0.026686	0.139812	C7orf69	chromosome 7 open reading frame 69
2783207	8.64	9.66	-2.03	0.026838	0.140072	PRSS12	protease, serine, 12 (neurotrypsin, motopsin)
3342426	6.75	7.8	-2.07	0.026912	0.140227	DDIAS	DNA damage-induced apoptosis suppressor
2890660	7.49	8.54	-2.08	0.027047	0.140507	GFPT2	glutamine-fructose-6-phosphate transaminase 2
3590388	7.98	9.15	-2.26	0.027576	0.141492	NUSAP1	nucleolar and spindle associated protein 1
2403446	7.49	6.12	2.59	0.027745	0.141853	PTAFR	platelet-activating factor receptor
2827177	4.8	3.61	2.28	0.027958	0.142654	TEX43	testis expressed 43
2340819	5.45	4.39	2.1	0.028184	0.143256	TCTEX1D1	Tctex1 domain containing 1
3884266	6.92	8.14	-2.32	0.028514	0.14428	NNAT	neuronatin
2939886	5.4	3.5	3.72	0.030343	0.149028	LYRM4	LYR motif containing 4
3792656	4.32	5.62	-2.46	0.030615	0.14986	CCDC102B	coiled-coil domain containing 102B
3629103	7.2	8.65	-2.73	0.030891	0.150518	KIAA0101	KIAA0101
3677164	9.4	8.32	2.12	0.03123	0.151335	TCEB2	transcription elongation factor B (SIII), polypeptide 2 (18kDa, elongin B)
2468351	7.37	5.54	3.55	0.032338	0.154181	RSAD2	radical S-adenosyl methionine domain containing 2
2338719	5.8	7.02	-2.33	0.033093	0.155552	NFIA	nuclear factor I/A
2742009	5.01	3.4	3.06	0.033531	0.156584	ADAD1	adenosine deaminase domain containing 1
2364381	10.23	8.99	2.37	0.034364	0.158565	RGS4	regulator of G-protein signaling 4
3463727	6.46	7.59	-2.19	0.034568	0.158867	LIN7A	lin-7 homolog A (C. elegans)
2434031	9.33	7.74	3.02	0.035277	0.160892	HIST2H2BF; HIST2H3D	histone cluster 2, H2bf; histone cluster 2, H3d
2703133	6.4	7.44	-2.05	0.036261	0.16345	IFT80; TRIM59	intraflagellar transport 80; tripartite motif containing 59
3053380	6.09	4.58	2.84	0.036311	0.163599	ERV3-1; ZNF117	endogenous retrovirus group 3, member 1; zinc finger protein 117
2888879	7.73	6.54	2.27	0.036563	0.164374	DOK3	docking protein 3
2363562	5.65	4.59	2.09	0.036638	0.16443	FCER1G	Fc fragment of IgE, high affinity I, receptor for; gamma polypeptide
2450345	5.67	6.7	-2.05	0.036717	0.16464	KIF14	kinesin family member 14
3257192	9.21	5.96	9.53	0.037176	0.165411	IFIT2	interferon-induced protein with tetratricopeptide repeats 2
3444503	3.34	4.59	-2.38	0.037582	0.166343	TAS2R31	taste receptor, type 2, member 31
3872584	5.4	4.32	2.11	0.038147	0.167845	C19orf18	chromosome 19 open reading frame 18
3102372	4.4	5.64	-2.36	0.04039	0.173174	SULF1	sulfatase 1
3103523	8.49	7.31	2.27	0.041841	0.176118	LY96; RPS3AP32	lymphocyte antigen 96; ribosomal protein S3a pseudogene 32
3082503	5.38	4.21	2.26	0.04188	0.176164	ZNF596	zinc finger protein 596
2615060	7.7	8.74	-2.05	0.042539	0.177309	RBMS3	RNA binding motif, single stranded interacting protein 3
3319119	4.17	5.69	-2.87	0.045483	0.183859	OLFML1	olfactomedin like 1
3175597	5.98	7.4	-2.67	0.046093	0.18507	VPS13A	vacuolar protein sorting 13 homolog A (S. cerevisiae)
3387259	4.49	5.67	-2.27	0.046102	0.18507	SESN3	sestrin 3
3801411	10.92	9.67	2.37	0.046271	0.185396	NPC1	Niemann-Pick disease, type C1
3133325	7.18	5.9	2.42	0.046834	0.186896	DKK4	dickkopf WNT signaling pathway inhibitor 4
2899090	6.68	7.86	-2.27	0.048364	0.190501	HIST1H3A	histone cluster 1, H3a
